# Supplementary material
Source: PubMed Central journal article supplement (PMC1945075)

Supplemental Figure 1, Hammarlund et al.

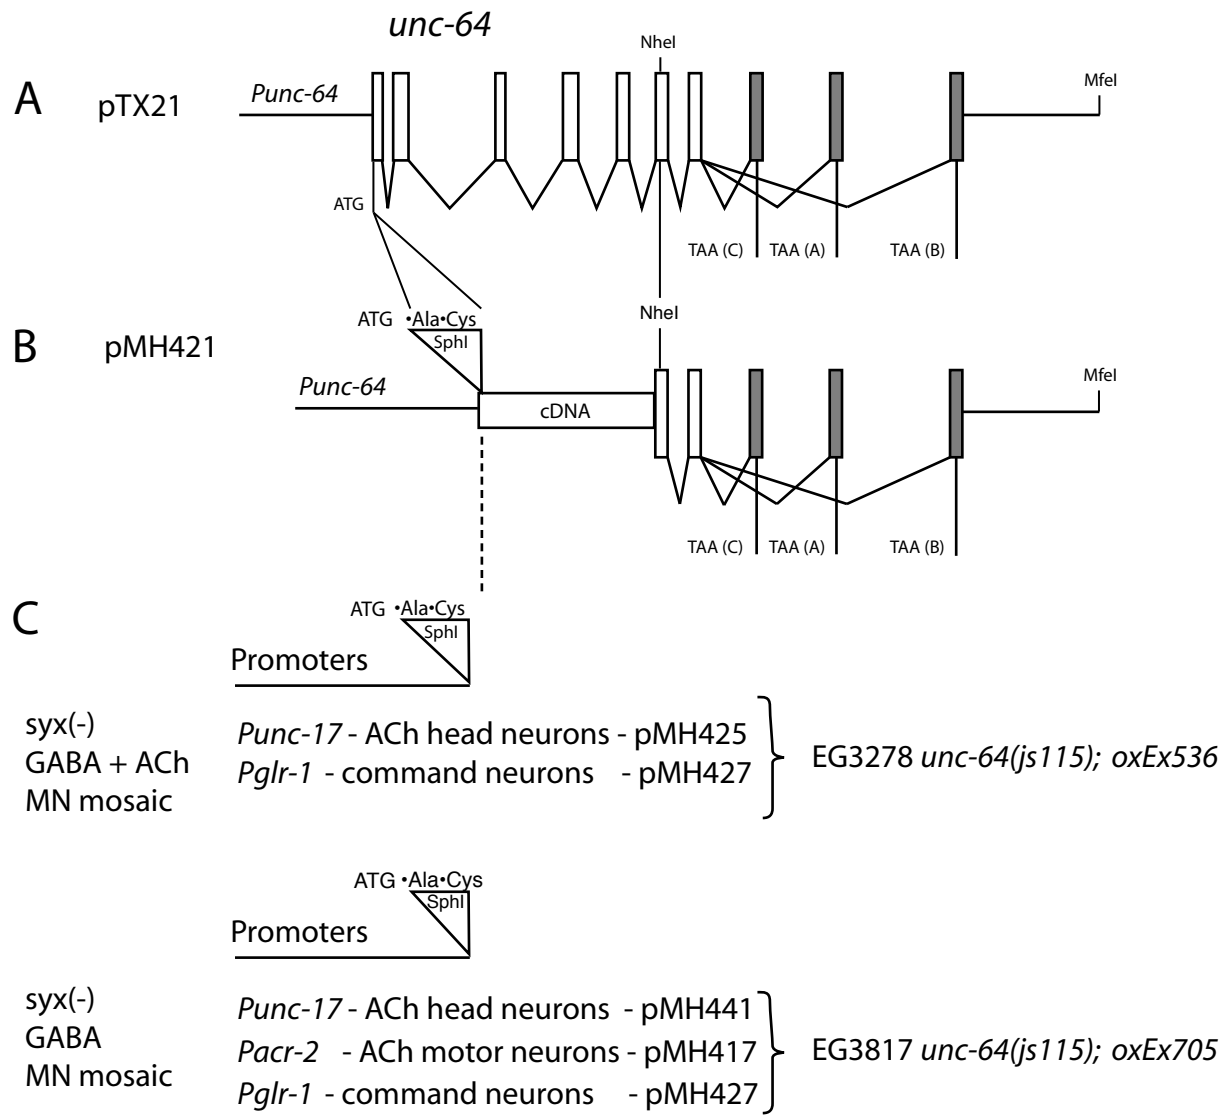

Supplement: pbio.0050198.sg001.pdf [file pbio.0050198.sg001.pdf]

Total vesicle distribution at GABA synapses (docked and non-docked)

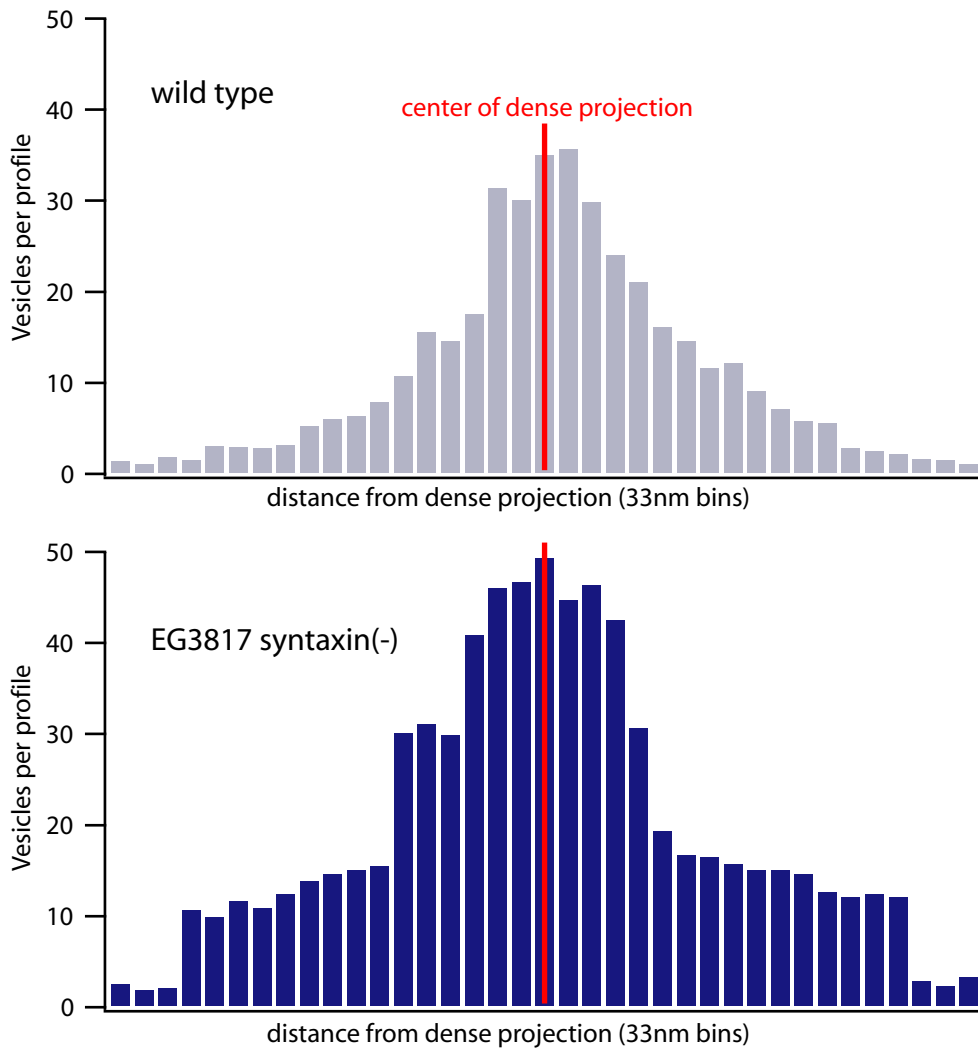

Supplement: pbio.0050198.sg003.pdf [file pbio.0050198.sg003.pdf]
